# Supplementary material
Source: PubMed Central journal article supplement (PMC2757849)
Supplement: 0908908106_0908908106SI.pdf [file 0908908106_0908908106SI.pdf]

# Supporting Information

Gibbs et al. 10.1073/pnas.0908908106

## SI Methods

**Antibodies Used in Immunoblotting or Immunoprecipitations (Indicated Dilutions Are for Immunoblotting).** AR (1:1000, #06–680 Upstate); acetylated lysine (#05–515 Upstate); acetylated tubulin (1:2000, #T6793 Sigma); alpha-tubulin (1:10,000, #T6074 Sigma); beta-actin (1:5000, #A5441 Sigma); ERG-1/2/3, (1:5000, #sc-354X Santa Cruz); FLAG epitope (#F7425 Sigma); GAPDH (1:5000, #sc-32233 Santa Cruz); HDAC6 (1:1000, #sc-11420 Santa Cruz); HSP90 (1:1000, #SPA-840 Stressgen); mouse IgG (#sc-2025 Santa Cruz). The following secondary antibodies were used: anti-mouse IgG (1:5000, #A6782 Sigma); anti-rabbit IgG (1:3000, #NA934 Amersham or 1:10,000, #sc-2004 Santa Cruz).

**ChIP PCR Primer Sequences and Conditions.** *PSA* ARE ChIP Sense Primer: GCCTGGATCTGAGAGAGATATCATC

*PSA* ARE ChIP Anti-Sense Primer: ACACCTTTTTTTT-TCTGGATTGTTG

*TMPRSS2* ARE ChIP Sense Primer: TGGTCCTGGAT-GATAAAAAAAGTTT

*TMPRSS2* ARE ChIP Anti-Sense Primer: GACATACGC-CCCACAACAGA

Primers were synthesized by Integrated DNA Technology (IDT). ChIP PCR program consisted of: 95 °C for 5 minutes for 1 cycle;

95 °C for 30 seconds, 58 °C (*TMPRSS2*) or 60 °C (*PSA*) for 30 seconds, and 72 °C for 30 seconds for 35–40 cycles; 72 °C final extension for 5 min.

**Real-time PCR Primer Sequences and Conditions.** Taqman gene expression assays for *AR* (Hs00171172\_m1), *PSA* (*KLK3*, Hs02576345\_m1), *HDAC6* (Hs00195869\_m1), and *I8S* endogenous control (4319413E) were purchased from Applied Biosystems.

*TMPRSS2-ERG* QRTPCR Sense Primer: CGCGAGCTA-AGCAGGAG

*TMPRSS2-ERG* QRTPCR Anti-Sense Primer: CGACTG-GTCCTCACTCACAA

*TMPRSS2-ERG* QRTPCR Probe: FAM5'-CGCGGCAG-GAAGCCTTATCAG-3'TAMRA

Primers and probe for *TMPRSS2-ERG* fusion were purchased from IDT. The real-time PCR program consisted of: 50 °C for 2 min for 1 cycle; 95 °C for 10 min for 1 cycle; 95 °C for 15 seconds; and 60 °C for 15 seconds for a total of 40 cycles.

**siRNA Sequences.** *HDAC6* gene: CTGCAAGGGATGGATCT-GAAC

Nontargeted control *luciferase* gene: CGTACGCG-GAATACTTCGA

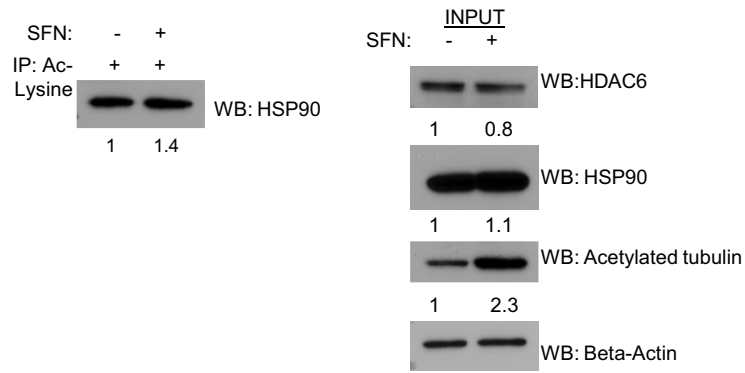

**Fig. 51.** Sulforaphane treatment of VCaP prostate cancer cells increases HSP90 acetylation in VCaP cells. An immunoprecipitation with an anti-acetyl lysine antibody was carried out after treatment with sulforaphane (SFN) 20  $\mu$ M or vehicle for 6 h followed by a Western blot for HSP90. Enrichment was quantified for each immunoprecipitation. Inputs were probed with the indicated antibodies by Western blot and were quantified.







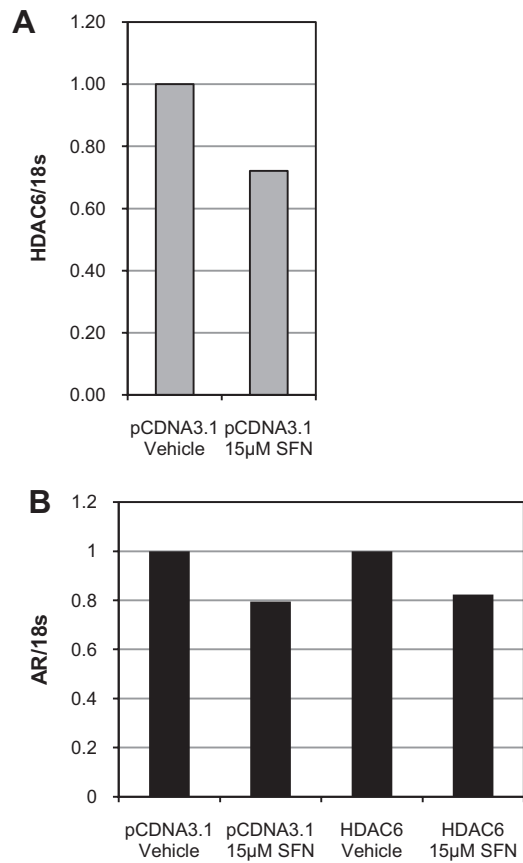

**Fig. 55.** Sulforaphane treatment of prostate cancer cells lowers *HDAC6* transcript levels whereas *HDAC6* overexpression does not increase *AR* transcript levels. LNCaP cells were transfected with pCDNA3.1 or FLAG-*HDAC6*. Cells were then treated with either vehicle or 15  $\mu$ M sulforaphane. (A) Real-time PCR of *HDAC6* expression. (B) Real-time PCR of *AR* expression. The vehicle-treated sample was set to 1. *18S* was used as an endogenous control in all assays.

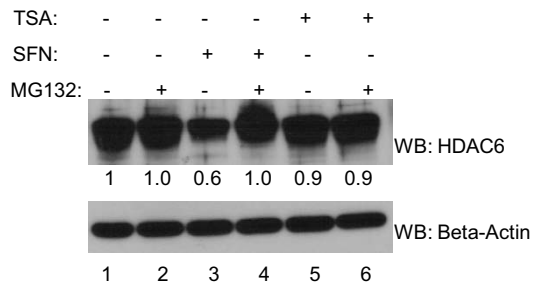

**Fig. S6.** Proteasome inhibitor treatment of prostate cancer cells rescues HDAC6 protein from sulforaphane treatment. LNCaP cancer cells were treated for 16 h with vehicle without (lane 1) or with (lane 2) 20  $\mu$ M MG132, 20  $\mu$ M sulforaphane without (lane 3) or with (lane 4) 20  $\mu$ M MG132, or 300 nM TSA without (lane 5) or with (lane 6) 20  $\mu$ M MG132. HDAC6 and actin levels were quantified by Western blot.
